1 **Development of novel PCR primer sets for DNA metabarcoding of aquatic insects,**  
2 **and the discovery of some cryptic species**

3

4 Masaki Takenaka<sup>1</sup>, Koki Yano<sup>2</sup>, Tomoya Suzuki<sup>3</sup>, Koji Tojo<sup>4,5</sup>

5

6 **Affiliations**

7 <sup>1</sup> Sugadaira Research Station, Mountain Science Center, University of Tsukuba,  
8 Sugadairakougen 1278-294, Ueda, Nagano, Japan

9 <sup>2</sup> Division of Evolutionary Developmental Biology, National Institute for Basic Biology,  
10 Nishigonaka 38, Myodaiji, Okazaki, Aichi, 44-8585, Japan

11 <sup>3</sup> Graduate School of Global Environmental Studies, Kyoto University, Yoshida  
12 Nihonmatsu-cho, Sakyo-ku, Kyoto 606-8501, Japan

13 <sup>4</sup> Department of Biology, Faculty of Science, Shinshu University, Asahi 3-1-1,  
14 Matsumoto, Nagano 390-8621, Japan

15 <sup>5</sup> Institute of Mountain Science, Shinshu University, Asahi 3-1-1, Matsumoto, Nagano  
16 390-8621, Japan

17

18 **Co-Correspondence:** Masaki Takenaka (masakiplayer@gmail.com) and Koji Tojo  
19 (ktojo@shinshu-u.ac.jp)

20

21 **Abstract**

22 DNA barcoding is a powerful tool that provides rapid, accurate, and automatable species  
23 identification by using standardized genetic region(s). It can be a powerful tool in various  
24 fields of biology such as for revealing the existence of cryptic species and/or rare species  
25 and in environmental science such as when monitoring river biota. Biodiversity reduction  
26 in recent times has become one of the most serious environmental issues on a worldwide  
27 scale. DNA barcoding techniques require the development of sets of universal PCR  
28 primers for DNA metabarcoding. We tried to develop universal primer sets for the DNA  
29 barcoding of all insect groups. In this study, we succeeded in designing not only universal  
30 primer sets for DNA barcoding regions of almost all insects, which were designed to  
31 include a hypervariable site between highly conserved sites, but also primer sets for  
32 longer fragment sequences for registration in a database. We confirmed successful  
33 amplification for 14 orders, 43 families, and 68 species with DNA barcoding in the  
34 mtDNA 16S rRNA region, and for 13 orders, 42 families, and 66 species with DNA  
35 barcoding in the mtDNA 12S rRNA region. A key feature is that the DNA fragments of  
36 the DNA barcoding regions amplified by these primer sets are both short at about 200-  
37 bp, and longer fragment sequences will increase the level of data registration in the DNA  
38 database. Such resulting database enhancements will serve as a powerful tool for  
39 increasingly accurate assessment of biodiversity and genetic diversity.

40

41

42 **Keywords:** Biodiversity, DNA barcoding, eDNA, mtDNA mtDNA 12S rRNA, 16S  
43 rRNA

44

45

46

## 47 **Introduction**

48 About 8.7 million eukaryotic species are estimated to inhabit the Earth (Mora et al. 2011).  
49 Insects are the largest and most diverse group of organisms on Earth, and about one  
50 million species have been described (Grimaldi and Engel 2005; Tojo et al. 2017; Stork  
51 2018). It is known that there are still many undescribed insect species, and new species  
52 are still described on a daily basis. A more accurate understanding of species diversity  
53 and elucidation of the mechanisms of diversity are important issues. On the other hand,  
54 as many species have been evaluated to be threatened with extinction, environmental  
55 conservation and species conservation efforts are also urgent tasks (Ceballos et al. 2015;  
56 Dirzo et al. 2014). For effective conservation measures of a particular species, it is  
57 important to appropriately assess and understand the current state of its biodiversity.

58 DNA barcoding is a system which provides rapid, accurate, and automatable species  
59 identification by using a standardized genetic region(s) (Hebert and Gregory 2005). In  
60 general, numerous insects are identified based on their morphological characteristics, but  
61 this method requires specialist knowledge and it takes a lot of time to acquire enough  
62 skills. Under such circumstances, DNA barcoding can rapidly identify a species by  
63 sequencing a standardized short DNA fragment, even if the specimens are difficult to  
64 identify by morphology (Hebert and Gregory 2005; Miya et al. 2015). In addition, DNA  
65 barcoding even allows species identification of specimens that are not suitable for species  
66 identification by means of traditional morphological classification, such as larval  
67 specimens or parts of specimens (incomplete specimens). Since this method is easy and  
68 fast, and its results are highly reproducible, it is possible use it for a wide range of species  
69 to undertake long-term monitoring and gain an understanding of their biodiversity  
70 (Hänfling et al. 2016; Uchida et al. 2020; Chucholl et al. 2021).

71 DNA barcoding is also an effective tool for identifying the existence of cryptic  
72 species and/or rare species (Hebert et al. 2004). In recent years, it has been reported that  
73 many cryptic species or undescribed species have been being discovered by conducting  
74 DNA barcoding-based genetic analyses (Vuataz et al. 2013; Saitoh et al. 2015; Struck et  
75 al. 2018; Takenaka and Tojo 2019; Yano et al. 2019; Ohnishi et al. 2021; Tojo et al. 2021).  
76 Of course, DNA barcoding does not replace traditional taxonomy (Schindel 2005). There  
77 is no doubt that highly experienced taxonomists are still required to scrutinize the  
78 taxonomic descriptions of such assessed species. As an interesting example of the use of  
79 DNA barcoding in recent studies, it was possible to understand past biodiversity by  
80 detecting the DNA of a particular fish from hundreds of years ago collected from seafloor  
81 sediments (Kuwae et al. 2020). Kudoh et al. (2020) identified a particular herbivorous  
82 insect using leaves with external foliage feeding marks and environmental DNA (eDNA)  
83 techniques. Moreover, for endangered species, DNA based non-invasive assessment of

84 biodiversity and corresponding genetic diversity is a breakthrough technique (Sekiya et  
85 al. 2017; Ahn et al. 2020; Yamazaki et al. 2020). Such methods are also expected to be  
86 applied to various other fields in addition to taxonomy.

87 For aquatic organisms, eDNA in aquatic environments has also facilitated the  
88 detection of an aquatic vertebrate species (Miya et al. 2015). It can be a powerful tool in  
89 the various fields of biology and environmental science such as in monitoring river biota.  
90 Biodiversity reduction in recent times has become one of the most serious environmental  
91 issues on a worldwide scale. In particular, freshwater organisms tend to account for a high  
92 proportion of Red List species. Under such circumstances, it is necessary to monitor  
93 biological fauna and flora to facilitate the conservation of biodiversity. For this purpose,  
94 eDNA analysis offers a powerful molecular tool capable of non-invasively surveying  
95 species richness within many ecosystems (Bohmann et al. 2014; Deiner et al. 2017;  
96 Uchida et al. 2020).

97 These techniques require the development of sets of universal PCR primers for DNA  
98 metabarcoding. For fish species, Miya et al. (2015) designed a set of universal PCR  
99 primers (i.e., “MiFish”) for the metabarcoding of eDNA. Also, these primers have been  
100 developed for various other animal taxa (e.g., “MiMammal” for mammals: Ushio et al.  
101 2017; “MiBird” for birds: Ushio et al. 2018; “MiDeca” for crustaceans, especially  
102 Decapoda: Komai et al. 2019). As for insects, which have the highest species diversity  
103 on the Earth, the mitochondrial DNA (mtDNA) cytochrome c oxidase subunit I (COI)  
104 region is frequently targeted using Folmer's universal primer set for DNA barcoding  
105 (Folmer et al. 1994). However, it is not a suitable primer set for DNA metabarcoding, as  
106 the protein-coding gene for amino acids of the mtDNA COI region is not highly  
107 conserved (Deagle et al. 2014); its third codon in particular is detected with a high number  
108 of polymorphisms. As such polymorphisms tend to be concentrated on the third base of  
109 each codon, we considered that it was not suitable for the development of a highly  
110 versatile primer set for amplification of short fragment sequences.

111 Many previous studies on non-insect groups using metabarcoding of eDNA have  
112 used primer sets developed from within their ribosomal RNA region (Miya et al. 2015;  
113 Ushio et al. 2017, 2018; Komai et al. 2019). Therefore, we also tried to design a universal  
114 primer set suitable for DNA metabarcoding of insects based on the ribosomal RNA region  
115 on the mtDNA.

116 The ideal characteristics of DNA fragments for a DNA barcoding region are listed  
117 below (Valentini et al. 2009; Miya et al. 2015). It must be 1) possible to reliably identify  
118 the specific insect species from it, so it needs to be completely the same or with only a  
119 minimal difference from other individuals of the same species, but with clear differences  
120 to the sequences of other species, 2) a homologous standardized region that is also able

121 to be used for amplification in all insect groups, 3) in a target region which has sufficient  
122 phylogenetic information to easily assign undescribed species to a taxon (genus or family),  
123 4) a highly preserved, reliable, robust fragment, 5) suitable for amplification of a short  
124 fragment and contain sufficient sequence variations in order to correctly assign the insect  
125 species.

126 Therefore, in this study, we tried to develop universal primer sets for DNA barcoding  
127 of all insect groups, by the methods set out below and as in Miya et al. (2015). Firstly,  
128 the primer sets developed in this study are applicable to all insect groups (especially  
129 aquatic insects), and the region contained between these versatile primers includes  
130 polymorphism-rich sites (hypervariable regions). Second, although the target region is a  
131 short-length sequence (about 200 bp), it is able to reliably distinguish species, even  
132 closely related species, and is also effective at capturing fragmented DNA such as  
133 samples recovered from eDNA present in an aquatic environment. However, it takes a lot  
134 of effort and is expensive to enrich a database that refers to the region amplified by using  
135 our newly designed primer sets. In order to enhance the database more efficiently, we  
136 designed versatile universal primer sets that amplify not only short fragments for DNA  
137 barcoding, but also longer fragments including a targeted barcoding region that can also  
138 be used for phylogenetic analyses. We consider that this primer set that can also amplify  
139 longer fragments is an ideal tool for phylogenetic studies; it will therefore be adopted as  
140 the optimal method and lead to the enhancement of databases that refer to eDNA.

141 We also examined whether the DNA region we selected for DNA metabarcoding  
142 contained sufficient polymorphisms to be effective in species differentiation even  
143 between closely related species, and also whether cryptic species could be readily  
144 detected from it. In aquatic insects, it is known that closely related species are niche-  
145 differentiated, each adapting to various river microhabitats (Ohgitani and Nakamura  
146 2008; Ohgitani et al. 2021; Okamoto and Tojo 2021; Okamoto et al. 2021). Heptageniid  
147 mayflies are a typical group exhibiting niche differentiation between closely related  
148 species (Ohgitani and Nakamura 2008; Tojo 2010) and are therefore suitable for testing  
149 the newly developed primers in this study. Previous studies using molecular markers have  
150 reported cases of discovering undescribed species and/or cryptic species as a result of  
151 phylogenetic analysis of species inhabiting a wide range and/or a variety of environments  
152 (Ueda et al. 2012; Yano et al. 2019). Also, the study is based on the hypothesis that  
153 *Epeorus aesculus* (Heptageniidae) also contains a cryptic species because *Epeorus*  
154 *aesculus* Imanishi, 1934, inhabit in a relatively wide range of river flow (Ohgitani and  
155 Nakamura 2008). From these viewpoints, we assessed and verified the detection ability  
156 and sensitivity of this newly developed DNA metabarcoding primer set using heptageniid  
157 mayflies, including *E. aesculus*.

158

## 159 **Materials and Methods**

### 160 **Development of primer sets**

161 In order to perform DNA metabarcoding, we focused on the mtDNA 16S rRNA and 12S  
162 rRNA regions because these ribosomal RNA regions have been reported to provide  
163 almost the same potential to correctly identify different individual species as the mtDNA  
164 COI region, which is the standard DNA barcoding region (Collins et al. 2019). We  
165 considered that these rRNA regions also have the advantage of having fewer intraspecific  
166 polymorphisms than the COI region. Also, for previous studies of other vertebrates and  
167 invertebrates, primer sets have been developed for DNA metabarcoding in the 16S rRNA  
168 or 12S rRNA regions (Miya et al. 2015; Ushio et al. 2017, 2018; Komai et al. 2019). The  
169 general DNA barcoding region for insects is the mtDNA COI region, but this could not  
170 be as effective as the versatile primers sets in this study due to the presence of  
171 polymorphisms every three bases.

172 In order to select a few suitable regions, whole or partial mitogenome sequences of  
173 various insect groups, to increase versatility, were downloaded from GenBank: aquatic  
174 insects [Ephemeroptera, Odonata, Plecoptera, each family of Hemiptera (Hemiptera s.  
175 lat.: Belostomatidae, Nepidae, Gerridae, Corixidae), Corydalidae, Trichoptera, each  
176 family of Coleoptera (Dytiscidae, Gyrinidae, Lampyridae, Dryopoidae), and each family  
177 of Diptera (Simuliidae, Culicidae, Tipulidae)], and Apterygota (Diplura, Archaeognatha,  
178 Zygentoma). Initially, we referred only to the sequences of aquatic insects because we  
179 were focusing on the DNA barcoding of aquatic insects. However, since aquatic insects  
180 include a wide range of insect groups, the results were used to search for a genetic region  
181 that could be applied to almost all insect groups. All sequences were aligned using  
182 MAFFT v7.222 (Katoh & Standley 2013) with the default set of parameters. The highly  
183 versatile areas were graphically represented using MEGA 7.0.26 (Kumar et al. 2016) and  
184 highly versatile regions were identified by means of visual inspection.

185 For the mtDNA 16S rRNA region, we searched for a highly versatile region using all  
186 data sets of all insect groups downloaded. However, it was not possible to design a single  
187 set for all insects in the highly versatile mtDNA 12S rRNA region for amplification;  
188 therefore, we designed three specialized primer sets to amplify the mtDNA 12S rRNA  
189 region for each of the three groups: 1) Hemimetabola, 2) Holometabola excluding  
190 Trichoptera, and 3) Trichoptera. In designing these generic primers, we applied the  
191 following recommendations made by Miya et al. (2015), paying attention to both ends of  
192 each primer so that not only the complementarity on the 3'-end, but also the region with  
193 high complementarity on the 5'-end were included.

194

## 195 **Testing the versatility of the newly developed primers**

196 To evaluate the versatility of the primers designed in this study, PCR amplification was  
197 conducted using the total genomic DNA extracted and purified from a variety of insect  
198 groups stored in the Tojo laboratory of Shinshu University, Japan (Table 1). Each total  
199 genomic DNA sample was used to amplify DNA fragments [the mtDNA 16S rRNA and  
200 12S rRNA regions] by polymerase chain reaction (PCR) with sets of primers designed in  
201 this study. Regarding each reaction, 1.0  $\mu$ L of 10x Ex Taq buffer, 0.8 $\mu$ L dNTP Mixture  
202 (included 25 mM MgCl<sub>2</sub>), 0.05 $\mu$ L of 5U/ $\mu$ L Ex Taq polymerase (TAKARA, Shiga),  
203 0.25 $\mu$ L of each primer, 1.0 $\mu$ L of extracted DNA in total 10 $\mu$ L. The PCR protocol for the  
204 DNA barcoding region in the mtDNA 16S rRNA and 12S rRNA regions was: 94 °C for  
205 1 min; 30 $\times$  (94 °C for 1 min, 50 °C for 30 sec or 1min, 72 °C for 30 sec); 72 °C for 3 min.  
206 The PCR protocol for the long fragment in the mtDNA 16S rRNA and 12S rRNA regions  
207 was: 94 °C for 1 min; 30 $\times$  (94 °C for 1 min, 51 °C for 30 sec, 74 °C for 1 min); 74 °C for  
208 3 min. The PCR products were purified using ExoSAP-IT Express (Thermo Fisher  
209 Scientific K.K., Tokyo, JP). Sequencing of purified DNA fragments was outsourced to  
210 Eurofins Genomics (Tokyo, Japan). A BigDye Terminator Cycle Sequence Kit v3.1  
211 (ABI) was used prior to sequencing with the ABI sequencer. Sequence data have been  
212 submitted to the DNA data-bank of Japan (DDBJ database; Accession numbers are given  
213 in Table 1). All sequence data were aligned using MAFFT v7.222 (Kato and Standley  
214 2013). Phylogenetic analyses were performed by the Neighbor-Joining (NJ) method using  
215 MEGA 7.0.26 (Kumar et al. 2016).

216

## 217 **Evaluation of interspecific variations and phylogenetic analysis**

218 To check for genetic variation between closely related species and within a species  
219 (detection of cryptic species/lineages), this study focused on *Epeorus aesculus*  
220 (Heptageniidae, Ephemeroptera). We used the total genomic DNA of 14 specimens of *E.*  
221 *aesculus* Imanishi, 1934, from four localities including topotype specimens (i.e.,  
222 specimens collected from the type locality: Kurobe-goro-zawa, Toyama, Toyama  
223 Prefecture) (Table S1).

224 With respect to the outgroups, we added appropriate DNA sequence data on *Epeorus*  
225 *dayongensis* (MK6422986, MT112895), *Epeorus herklotsi* (MG870104, NC\_039612),  
226 *Epeorus carinatus* (MT112896), and *Afronurus yixingensis* (MK642297). Each total  
227 genomic DNA sample was used to amplify DNA fragments [the mtDNA 16S rRNA and  
228 12S rRNA regions] by polymerase chain reaction (PCR) with sets of primers designed in  
229 this study. The PCR products were purified using ExoSAP-IT Express (Thermo Fisher  
230 Scientific K.K., Tokyo, JP). Sequencing of purified DNA fragments was outsourced to  
231 Eurofins Genomics (Tokyo, Japan). A BigDye Terminator Cycle Sequence Kit v3.1

232 (ABI) was used prior to sequencing with the ABI sequencer. Sequence data have been  
233 submitted to the DNA data-bank of Japan (DDBJ database; Accession numbers are given  
234 in Table S1).

235 Sequence alignment and editing were performed using the same methods for each  
236 gene separately using ATGC bundled with GENETYX ver. 15.2 (GENETYX  
237 Corporation). All sequence data were aligned using MAFFT v7.222 (Katoh and Standley,  
238 2013). Phylogenetic analyses were performed by Bayesian analysis using MrBayes v3.2.6  
239 (Ronquist et al. 2012). The program Kakusan4 (Tanabe 2007) was used to select  
240 appropriate models based on Schwarz's Bayesian Information Criterion (BIC; Schwarz,  
241 1978). Best-fit substitution models were chosen as follows: HKY + G for the mtDNA 16S  
242 rRNA; HKY + G for the mtDNA 12S rRNA regions. Bayesian MCMC simulations were  
243 run for 10 million generations, sampling every 1000 generations. The output files were  
244 checked for convergence after removing a 10% burn-in by examining Effective Sampling  
245 Size (ESS > 200) using Tracer v1.6 (Rambaut et al. 2014). Then, this was visualized in  
246 the resulting tree created by FigTree v1.3.1 (Rambaut 2009).

247

248

## 249 **Results and Discussion**

### 250 **Design of versatile primer sets for DNA metabarcoding**

251 We designed a primer set, "MtInsects-16S", for amplification of the DNA barcoding  
252 regions in the mtDNA 16S rRNA region that is applicable to almost all insect groups. We  
253 also designed a primer "AQdb-16S" that can be used to PCR-amplify longer DNA  
254 fragments containing the DNA barcoding region and this is highly effective for  
255 phylogenetic analyses. This primer set will be very effective and useful when registering  
256 reference sequences. (Table 2; Fig. 1). The positional relationship of each primer is shown  
257 in Figure S1.

258 On the other hand, in the mtDNA 12S rRNA region, we designed primer sets that  
259 amplified the DNA barcoding region for each of three groups: 1) Hemimetabola, 2)  
260 Holometabola excluding Trichoptera, and 3) Trichoptera. For Hemimetabola,  
261 "MtInsects-12S\_HemHol\_F" and "MtInsects-12S\_Hem\_R" were used as the primer set  
262 to amplify the DNA barcoding region. For Holometabola excluding Trichoptera,  
263 "MtInsects-12S\_HemHol\_F" (the same as Hemimetabola) and "MtInsects-12S\_Hol\_R"  
264 were used as the primer sets to amplify the DNA barcoding region. For Trichoptera,  
265 "MtInsects-12S\_cad\_F" and "MtInsects-12S\_cad\_R" were used as the primer sets to  
266 amplify the DNA barcoding region (Table 2; Fig. 1).

267 We also designed three primer sets to amplify longer fragments including each of  
268 the three DNA barcoding regions of each group: 1) Hemimetabola, 2) Holometabola



269 excluding Trichoptera, and 3) Trichoptera. In Hemimetabola, “MtInsects-  
270 12S\_HemHol\_F” (the same as DNA barcoding) and “AQdb-12S\_Hem\_R” were used as  
271 a primer set; in Holometabola excluding Trichoptera, “MtInsects-12S\_HemHol\_F” (the  
272 same as DNA barcoding) and “AQdb-12S\_Hol\_R”; were used as a primer set, and in  
273 Trichoptera, “MtInsects-12S\_cad\_F” and “AQdb-12S\_cad\_R” were used as a primer set  
274 (Table 2; Fig. 1). The positional relationship of each primer is shown in Figure S2.

275 The above primer information is shown in Table 2. All primers were designed to put  
276 a hypervariable region between highly conserved regions (Fig. 2). It shows a comparison  
277 of the polymorphisms of primer sites in all insects used in the search for primer sites in  
278 this study (Table S2-13, Fig. 1). The concordance rate of each locus (the graph above)  
279 and rate of each nucleic acid sequence (include indel) in the full length mtDNA 16S rRNA,  
280 12S rRNA regions, and the COI region, which is the standard DNA barcoding region for  
281 insects, are shown in Fig S3. These results show that the primer sets for DNA  
282 metabarcoding developed in this study have been optimized to select the best sites  
283 because the primer regions have a higher nucleic sequence concordance rate than other  
284 loci, except for the regions with a lot of indels. Also, we suggested that the mtDNA COI  
285 region, which is the standard DNA barcoding region for insects, is an unsuitable DNA  
286 barcoding region to use for all insects because there was no region with a continuous high  
287 concordance rate. For the mtDNA COI region, it was not possible to find regions with  
288 high concordance rates, even at the mayfly order level.

289

### 290 **Versatility and nucleotide polymorphisms of the DNA metabarcoding regions**

291 In this study, using each of the applicable primer sets designed for PCR and Sanger  
292 sequencing, we succeeded in the PCR amplification and sequencing of DNA barcoding  
293 regions and longer fragments, including the respective DNA barcoding regions, for all  
294 species used. We confirmed successful amplification for 14 orders, 43 families, and 68  
295 species using DNA barcoding in the mtDNA 16S rRNA region, and for 13 orders, 42  
296 families, and 66 species for DNA barcoding in the mtDNA 12S rRNA (Table 1). It is  
297 necessary to confirm the methodology developed in this study in practice in future DNA  
298 barcoding and/or DNA metabarcoding research (e.g., eDNA), but there is no doubt that  
299 all the primers designed in this study have high versatility. Although PCR amplification  
300 was successful in all examined species of the various insect groups tested, care should be  
301 taken when using primer sets for the mtDNA 12S rRNA region in which T<sub>m</sub> values differ  
302 by about 10°C between the forward and reverse primers. In the mtDNA 12S rRNA region,  
303 the GC nucleotides contained at the sites where the primers were designed was biased, so  
304 the T<sub>m</sub> values of these primers could not be made uniform (Fig. S3).

305 A phylogenetic cladogram was constructed to investigate whether species could  
306 be identified using the DNA barcoding regions amplified using each primer set designed  
307 in this study (Fig. 3). As a result, the species analyzed could be identified and did not in  
308 any case share the same genotype among different species. In particular, as the DNA  
309 barcoding regions selected using our newly designed primer sets retain sufficient  
310 polymorphisms to identify each species, they can even differentiate between species of  
311 the same genus (Fig. 3).

312 Our study detected only two exceptional cases of inadequate DNA barcoding, both  
313 of which were due to species characteristics or for taxonomically problematic species.  
314 The marker (primer set) of the mtDNA 16S rRNA region we designed could not  
315 distinguish between two sub-species, *Hesperocorixa distanti hokkensis* and  
316 *Hesperocorixa distanti distanti*. However, these subspecies cannot be differentiated even  
317 using the sequence data of the mtDNA COI region (Yano et al. 2020). Therefore, these  
318 species cannot be differentiated by genetic markers or are possibly not in fact  
319 differentiated at the subspecies level. Regarding the second case, in the mtDNA 12S  
320 rRNA region, no genetic differentiation was observable between *Ephemera japonica* and  
321 *Ephemera strigata*. These species are sister species to each other, and are widely  
322 distributed sympatrically in the Japanese Islands (Okamoto and Tojo 2021). We  
323 confirmed interspecies introgression in areas where these two species had re-contacted  
324 after speciation (Takenaka et al. unpublished data). Therefore, we do not think such cases  
325 nullify the versatility of the primers we have developed.

326

327

### 328 **DNA barcoding method sufficiently sensitive to detect cryptic species**

329 It is known that there are cryptic species within the mayfly species, *Epeorus aesculus*  
330 (Ogitani and Nakamura 2008; Tojo 2010). Therefore, this is a suitable species or species  
331 group to assess the potential of the genetic region we proposed for phylogenetic analysis.  
332 *Epeorus aesculus* were collected from multiple streams in the Japan Alps, including the  
333 type locality, and genetic analyses were conducted using the primer sets developed in this  
334 study to amplify longer fragments of their mtDNA 16S rRNA and 12S rRNA regions. As  
335 a result, a clade (i.e., Clade B) was detected that was largely genetically differentiated  
336 from another clade (i.e., Clade A: including the topotype specimens) collected at Kurobe-  
337 goro-zawa, which is the type locality of *E. aesculus* (Fig. 4). This means that *E. aesculus*,  
338 which has been treated as one species, has intraspecific large scale genetic differentiation,  
339 i.e., a cryptic species. Although it is necessary to investigate more samples and their  
340 morphology in detail, the results of this study adequately identified the existence of a  
341 known cryptic species or an undescribed species.

342 Today, DNA barcoding is a powerful tool for assessing biodiversity (Struck et al.  
343 2018; Mosa et al. 2019). Most importantly, the genetic region of longer fragments  
344 amplified by the primer sets newly designed in this study contain a high number of  
345 polymorphisms by which detection of even cryptic species is possible. In addition, our  
346 development of the DNA barcoding methodology for short DNA fragments of about 200-  
347 bp will undoubtedly bring about further significant innovation in DNA metabarcoding  
348 methodology. Especially for aquatic insects, further development in the utilization of  
349 eDNA is anticipated. Under such circumstances, we believe that this study constitutes a  
350 methodological breakthrough that will underpin significant research advances.

351

352

### 353 **Conclusion**

354 In this study, we succeeded in developing universal primer sets and newly selected  
355 optimal DNA barcoding regions. A key feature is that the DNA fragments amplified by  
356 these primer sets are both short at about 200-bp. By developing these primer sets for DNA  
357 barcoding or DNA metabarcoding that can be applied to almost all insect groups, it will  
358 enable relatively easy long-term monitoring of insect species composition and species  
359 diversity. In addition, it is also expected to facilitate the discovery of many undescribed  
360 species and/or cryptic species that have been overlooked or are difficult to identify  
361 morphologically.

362 We have established a barcoding region in the mtDNA ribosomal region; however,  
363 it is possible that closely related species that could not be identified using ribosomal  
364 regions will become identifiable in the future. For fish, it has been reported that the  
365 universal primer “MiFish” for the metabarcoding primers cannot differentiate species or  
366 amplify the barcoding region of some groups, so new primer sets focusing on specific  
367 groups have been designed (genus *Anguilla*: Takeuchi et al. 2019; Salmonidae: Morita et  
368 al. 2019; Cichlidae: Doble et al. 2019).

369 In the case of insects, if it is not possible to identify species using the ribosome DNA  
370 regions developed in this study, it may be able to identify them by using the mtDNA COI  
371 region, which is the traditional standard DNA barcoding region. In such cases, it would  
372 be best to make effective use of the existing database. Also, we recommend using multiple  
373 genetic regions to improve the accuracy and reliability of species identification.

374 Finally, we were able to design not only DNA barcoding region markers, but also primer  
375 sets for longer fragment sequences for registration in the database. These primer sets that  
376 can amplify longer fragments can also be used for phylogenetic analyses, which will  
377 increase the level of data registration in the DNA database. In addition, such resulting

378 database enhancements will serve as a powerful tool for increasingly accurate assessment  
379 of biodiversity and genetic diversity.

380

381

### 382 **Supplementary Information**

383 **Table S1.** List of specimens of *Epeorus* mayflies examined in this study, sequence types,  
384 and the GenBank accession numbers

385

386 **Table S2.** Nucleotide sequences of universal primer (MtInsects-16S\_F) and homologous  
387 region of 557 sequences of insects used for development in this study.

388

389 **Table S3.** Nucleotide sequences of universal primer (MtInsects-16S\_R) and homologous  
390 region of 557 sequences of insects used for development in this study.

391

392 **Table S4.** Nucleotide sequences of universal primer (AQdb-16S\_F) and homologous  
393 region of 557 sequences of insects used for development in this study.

394

395 **Table S5.** Nucleotide sequences of universal primer (AQdb-16S\_R) and homologous  
396 region of 558 sequences of insects used for development in this study.

397

398 **Table S6.** Nucleotide sequences of universal primer (MtInsects-12S\_HemHol\_F) and  
399 homologous region of 491 sequences of insects used for development in this study.

400

401 **Table S7.** Nucleotide sequences of universal primer (MtInsects-12S-Hem\_R) and  
402 homologous region of 265 sequences of insects used for development in this study.

403

404 **Table S8.** Nucleotide sequences of universal primer (MtInsects-12S\_Hol\_R) and  
405 homologous region of 209 sequences of insects used for development in this study.

406

407 **Table S9.** Nucleotide sequences of universal primer (MtInsects-12S\_cad\_F) and  
408 homologous region of 31 sequences of trichopteran insects used for development in this  
409 study.

410

411 **Table S10.** Nucleotide sequences of universal primer (MtInsects-12S\_cad\_R) and  
412 homologous region of 31 sequences of trichopteran insects used for development in this  
413 study.

414

415 **Table S11.** Nucleotide sequences of universal primer (AQdb-12S\_Hem\_R) and  
416 homologous region of 265 sequences of insects used for development in this study.

417

418 **Table S12.** Nucleotide sequences of universal primer (AQdb-12S\_Hol\_R) and  
419 homologous region of 214 sequences of insects used for development in this study.

420

421 **Table S13.** Nucleotide sequences of universal primer (AQdb-12S\_cad\_R) and  
422 homologous region of 31 sequences of trichopteran insects used for development in this  
423 study.

424

425

426 **Figure S1.** Position of primers sets in the mtDNA 16S rRNA region. Reference sequence  
427 data used the mtDNA 16S rRNA region in the complete mitochondrion genome of  
428 *Ephemera orientalis* (NC\_012645).

429

430 **Figure S2.** Position of primers sets in the mtDNA 12S rRNA region. Reference sequence  
431 data used the mtDNA 12S rRNA region in the complete mitochondrion genome of  
432 *Ephemera orientalis* (NC\_012645).

433

434 **Figure S3.** Graph of the nucleotide concordance rate (0.0-1.0; above) and the proportion  
435 of adenine (A: green), thymine (T: red), guanine (G: purple), cytosine (C: blue) and indel  
436 (white) (0.0-1.0; below) in each nucleotide position in the full length of each of the  
437 mtDNA 16S rRNA, 12S rRNA, and the COI regions. The nucleotide concordance rate of  
438 each locus is shown by gray bars, and the region of each newly designed primer is shown  
439 black bars.

440

441

#### 442 **Acknowledgements**

443 We express our thanks to Dr. Y. Iwasaki (National Institute of Advanced Industrial  
444 Science and Technology), Dr. N. Uchida (Tohoku University), Dr. N. Kondo (National  
445 Institute of Environmental studies), Dr. Y. Hasebe (Kanagawa Prefectural Government)  
446 for valuable advice and encouragement. We are indebted to Tojo Lab. members (Shinshu  
447 University) and Niimi Lab. members (NIBB) for their cooperation with the field research  
448 and collection of specimens. This study was supported by grants from the River  
449 Environment Fund (22-1215-021 to KT, 2017-5211-025 to KT, 2021-5311-005 to MT)  
450 of River and Watershed Environment Management.

451

452

453 **Contributions**

454 M.T. designed, managed the study, and performed sample collection; M.T., K.Y. mainly  
455 performed laboratory work and phylogenetic analyses; M.T., K.Y., T.S. designed Figures  
456 and Tables; M.T., K.T. gathered funds; M.T., K.Y., and M.T., K.Y., T.S., K.T. wrote and  
457 reviewed the manuscript.

458

459

460 **Ethics declarations**

461 The authors declare that they have no competing interests. The experiments comply with  
462 the current laws of the country in which they were performed.

463

464

465 **References**

466 Ahn H, Kume M, Terashima Y, Ye F, Kameyama S, Miya M, Yamashita Y, Kasai A  
467 (2020) Evaluation of fish biodiversity in estuaries using environmental DNA  
468 metabarcoding. *PloS ONE* 15: e0231127.  
469 <https://doi.org/10.1371/journal.pone.0231127>

470 Bohmann K, Evans A, Gilbert MTP, Carvalho GR, Creer S, Knapp M, Douglas WY, De  
471 Bruyn M (2014) Environmental DNA for wildlife biology and biodiversity  
472 monitoring. *Trends Ecol. Evol.* 29: 358-367.  
473 <https://doi.org/10.1016/j.tree.2014.04.003>

474 Ceballos G, Ehrlich PR, Barnosky AD, García A, Pringle RM, Palmer TM (2015)  
475 Accelerated modern human-induced species losses: Entering the sixth mass  
476 extinction. *Sci. Adv.* 1: e1400253. <https://doi.org/10.1126/sciadv.1400253>

477 Chucholl F, Fiolka F, Segelbacher G, Epp LS (2021) eDNA detection of native and  
478 invasive crayfish species allows for year-round monitoring and large-scale screening  
479 of lotic systems. *Front. Environ. Sci.* 9: 23.  
480 <https://doi.org/10.3389/fenvs.2021.639380>

481 Collins RA, Bakker J, Wangensteen OS, Soto AZ, Corrigan L, Sims DW, Genner MJ,  
482 Mariani S (2019) Non-specific amplification compromises environmental DNA  
483 metabarcoding with COI. *Methods Ecol. Evol.* 10: 1985-2001.  
484 <https://doi.org/10.1111/2041-210X.13276>

485 Deagle BE, Jarman SN, Coissac E, Pompanon F, Taberlet P (2014) DNA metabarcoding  
486 and the cytochrome c oxidase subunit I marker: not a perfect match. *Biol. Lett.* 10:  
487 20140562. <https://doi.org/10.1098/rsbl.2014.0562>

- 488 Deiner K, Bik HM, Mächler E, Seymour M, Lacoursière-Roussel A, Altermatt F, Creer  
489 S, Bista I, Lodge DM, de Vere N, Pfrender ME, Bernatchez L (2017) Environmental  
490 DNA metabarcoding: Transforming how we survey animal and plant communities.  
491 Mol. Ecol. 26: 5872-5895. <https://doi.org/10.1111/mec.14350>
- 492 Dirzo R, Young HS, Galetti M, Ceballos G, Isaac NJ, Collen B (2014) Defaunation in the  
493 Anthropocene. Science 345: 401-406. <https://doi.org/10.1126/science.1251817>
- 494 Doble CJ, Hipperson H, Salzburger W, Horsburgh GJ, Mwita C, Murrell DJ, Day JJ  
495 (2020) Testing the performance of environmental DNA metabarcoding for surveying  
496 highly diverse tropical fish communities: A case study from Lake Tanganyika.  
497 Environmental DNA 2: 24-41. <https://doi.org/10.1002/edn3.43>
- 498 Folmer O, Black M, Hoeh W, Lutz R, Vrijenhoek R (1994) DNA primers for  
499 amplification of mitochondrial cytochrome c oxidase subunit I from diverse  
500 metazoan invertebrates. Mol. Mar. Biol. Biotechnol. 3: 294-9.
- 501 Grimaldi D, Engel MS (2005) Evolution of the Insects. Cambridge University Press,  
502 Cambridge.
- 503 Hänfling B, Lawson Handley L, Read DS, Hahn C, Li J, Nichols P, Blackman RC, Oliver  
504 A, Winfield IJ (2016) Environmental DNA metabarcoding of lake fish communities  
505 reflects long-term data from established survey methods. Mol. Ecol. 25: 3101-3119.  
506 <https://doi.org/10.1111/mec.13660>
- 507 Hebert PD, Penton EH, Burns JM, Janzen DH, Hallwachs W (2004) Ten species in one:  
508 DNA barcoding reveals cryptic species in the neotropical skipper butterfly *Astraptes*  
509 *fulgerator*. Proc. Natl. Acad. Sci. 101: 14812-14817.  
510 <https://doi.org/10.1073/pnas.0406166101>
- 511 Hebert PD, Gregory TR (2005) The promise of DNA barcoding for taxonomy. Syst. Biol.  
512 54: 852-859. <https://doi.org/10.1080/10635150500354886>
- 513 Hebert PD, Gregory TR (2005) The promise of DNA barcoding for taxonomy. Syst. Biol.  
514 54: 852-859. <https://doi.org/10.1080/10635150500354886>
- 515 Katoh K, Standley DM (2013) MAFFT multiple sequence alignment software version 7:  
516 improvements in performance and usability. Mol. Biol. Evol. 30: 772-780.  
517 <https://doi.org/10.1093/molbev/mst010>
- 518 Komai T, Gotoh RO, Sado T, Miya M (2019) Development of a new set of PCR primers  
519 for eDNA metabarcoding decapod crustaceans. Metabarcoding Metagenom. 3:  
520 e33835. <https://doi.org/10.3897/mbmg.3.33835>
- 521 Kudoh A, Minamoto T, Yamamoto S (2020) Detection of herbivory: eDNA detection  
522 from feeding marks on leaves. Environmental DNA 2: 627-634.

- 523 Kumar S, Stecher G, Tamura K (2016) MEGA7: molecular evolutionary genetics analysis  
524 version 7.0 for bigger datasets. *Mol. Biol. Evol.* 33: 1870-1874.  
525 <https://doi.org/10.1093/molbev/msw054>
- 526 Kuwae M, Tamai H, Doi H, Sakata MK, Minamoto T, Suzuki Y (2020) Sedimentary  
527 DNA tracks decadal-centennial changes in fish abundance. *Commun. Biol.* 3: 1-12.  
528 <https://doi.org/10.1038/s42003-020-01282-9>
- 529 Miya M, Sato Y, Fukunaga T, Sado T, Poulsen JY, Sato K, Minamoto T, Yamamoto S,  
530 Yamanaka H, Araki H, Iwasaki W (2015) MiFish, a set of universal PCR primers  
531 for metabarcoding environmental DNA from fishes: detection of more than 230  
532 subtropical marine species. *Royal Soc. Open Sci.* 2: 150088.  
533 <https://doi.org/10.1098/rsos.150088>
- 534 Mora C, Tittensor DP, Adl S, Simpson AG, Worm B (2011) How many species are there  
535 on Earth and in the ocean?. *PLoS Biol.* 9: e1001127.  
536 <https://doi.org/10.1371/journal.pbio.1001127>
- 537 Morita K, Sahashi G, Miya M, Kamada S, Kanbe T, Araki H (2019) Ongoing localized  
538 extinctions of stream-dwelling white-spotted charr populations in small dammed-off  
539 habitats of Hokkaido Island, Japan. *Hydrobiologia* 840: 207-213.  
540 <https://doi.org/10.1007/s10750-019-3891-1>
- 541 Mosa KA, Gairola S, Jamdade R, El-Keblawy A, Al Shaer KI, Al Harthi EK, ShabanaHA,  
542 Mahmoud T (2019) The promise of molecular and genomic techniques for  
543 biodiversity research and DNA barcoding of the Arabian Peninsula flora. *Front.*  
544 *Plant Sci.* 9: 1929. <https://doi.org/10.3389/fpls.2018.01929>
- 545 Okamoto S, Saito T, Tojo K (2021) Geographical fine-scaled distributional  
546 differentiation caused by niche differentiation in three closely related mayflies.  
547 *Limnol.* <https://doi.org/10.1007/s10201-021-00673-z>.
- 548 Okamoto, S., & Tojo, K. (2021). Distribution patterns and niche segregation of three  
549 closely related Japanese ephemeropterid mayflies: a re-examination of each species'  
550 habitat from “megadata” held in the “National Census on River Environments”.  
551 *Limnol.* 22: 227-287. <https://doi.org/10.1007/s10201-021-00654-2>
- 552 Ohgitani M, Nakamura H (2008) Distribution and Seasonal Population Change of  
553 Heptageniidae Nymph in the Oguro River (The Branch of Tenryu River). *The*  
554 *Annals of environmental science, Shinshu University* 30: 57-66. [Japanese]
- 555 Ohnishi O, Takenaka M, Okano R, Yoshitomi H, Tojo K (2021) Wide-scale gene flow,  
556 even in Insects that have lost their flight ability: presence of dispersion due to a  
557 unique parasitic ecological strategy of piggybacking hosts. *Zool. Sci.* 38: 122-139.  
558 <https://doi.org/10.2108/zs200088>



- 559 Rambaut A (2009) FigTree, Version 1.3.1. Available at: [http://tree.bio.ed.ac.uk/](http://tree.bio.ed.ac.uk/software/figtree/)  
560 [software/figtree/](http://tree.bio.ed.ac.uk/software/figtree/) (cited 25 March 2019).
- 561 Rambaut A, Suchard MA, Xie D, Drummond AJ (2014) Tracer, version 1.6, MCMC trace  
562 analysis package. Available at: <http://tree.bio.ed.ac.uk/software/tracer/> (cited 25  
563 March 2019).
- 564 Ronquist F, Teslenko M, van der Mark P, Ayres DL, Darling A, Höhna S, Larget B, Liu  
565 L, Suchard MA, Huelsenbeck JP (2012) MrBayes 3.2: efficient Bayesian  
566 phylogenetic inference and model choice across a large model space. *Syst. Biol.* 61:  
567 539-542. <https://doi.org/10.1093/sysbio/sys029>
- 568 Saitoh T, Sugita N, Someya S, Iwami Y, Kobayashi S, Kamigaichi H, Higuchi A, Asai S,  
569 Yamamoto Y, Nishiumi I (2015) DNA barcoding reveals 24 distinct lineages as  
570 cryptic bird species candidates in and around the Japanese Archipelago. *Mol. Ecol.*  
571 *Resour.* 15: 177-186. <https://doi.org/10.1111/1755-0998.12282>
- 572 Kumar S, Stecher G, Tamura K (2016) MEGA7: molecular evolutionary genetics analysis  
573 version 7.0 for bigger datasets. *Mol. Biol. Evol.* 33: 1870-1874.  
574 <https://doi.org/10.1093/molbev/msw054>
- 575 Schindel DE, Miller SE (2005) DNA barcoding a useful tool for taxonomists. *Nature* 435:  
576 17.
- 577 Schwarz G (1978) Estimating the dimension of a model. *Ann. Stat.* 6: 461-464.
- 578 Sekiya T, Ichiyanagi H, Tojo K (2017) Establishing of genetic analyses methods of feces  
579 from the water shrew, *Chimarrogale platycephalus* (Erinaceidae, Eulipotyphla).  
580 *JSM Biol.* 2: 1010.
- 581 Stork NE (2018) How many species of insects and other terrestrial arthropods are there  
582 on Earth?. *Annu. Rev. Entomol.* 63: 31-45. [https://doi.org/10.1146/annurev-ento-](https://doi.org/10.1146/annurev-ento-020117-043348)  
583 [020117-043348](https://doi.org/10.1146/annurev-ento-020117-043348)
- 584 Struck TH, Feder JL, Bendiksby M, Birkeland S, Cerca J, Gusarov VI, Kistenich S,  
585 Larsson KH, Liow LH, Nowak MD, Stedje B, Bachmann L, Dimitrov D (2018)  
586 Finding evolutionary processes hidden in cryptic species. *Trends Ecol. Evol.* 33:  
587 153-163. <https://doi.org/10.1016/j.tree.2017.11.007>
- 588 Takenaka M, Tojo K (2019) Ancient origin of a dipteromimid mayfly family endemic to  
589 the Japanese Islands and its genetic differentiation across tectonic faults. *Biol. J.*  
590 *Linn. Soc.* 126: 555-573. <https://doi.org/10.1093/biolinnean/bly192>
- 591 Takeuchi A, Iijima T, Kakuzen W, Watanabe S, Yamada Y, Okamura A, Horie N,  
592 Mikawa N, Miller MJ, Kojima T, Tsukamoto K (2019) Release of eDNA by different  
593 life history stages and during spawning activities of laboratory-reared Japanese eels  
594 for interpretation of oceanic survey data. *Sci. Rep.* 9: 1-9.  
595 <https://doi.org/10.1038/s41598-019-42641-9>

- 596 Tanabe AS (2007) Kakusan: a computer program to automate the selection of a nucleotide  
597 substitution model and the configuration of a mixed model on multilocus data. *Mol.*  
598 *Ecol. Notes* 7: 962-964. <https://doi.org/10.1111/j.1471-8286.2007.01807.x>
- 599 Tojo K (2010) The current distribution of aquatic insects in habiting river systems, with  
600 respect to their population and genetic structure. In Harris EL, Davies NE (eds).  
601 *Insect habitats: characteristics, diversity and management*. Nova Science, New  
602 York: 157-161.
- 603 Tojo K, Sekiné K, Takenaka M, Isaka Y, Komaki S, Suzuki T, Schoville SD (2017)  
604 Species diversity of insects in Japan: their origins and diversification processes.  
605 *Entomol. Sci.* 20: 357-381. <https://doi.org/10.1111/ens.12261>
- 606 Ueda S, Nozawa T, Matsuzuki T, Seki RI, Shimamoto S, Itino T (2012) Phylogeny and  
607 phylogeography of *Myrmica rubra* complex (Myrmicinae) in the Japanese Alps.  
608 *Psyche* 2012: 1-7. <https://doi.org/10.1155/2012/319097>
- 609 Uchida N, Kubota K, Aita S, Kazama S (2020) Aquatic insect community structure  
610 revealed by eDNA metabarcoding derives indices for environmental assessment.  
611 *PeerJ* 8: e9176. <https://doi.org/10.7717/peerj.9176>
- 612 Ushio M, Fukuda H, Inoue T, Makoto K, Kishida O, Sato K, Murata K, Nikaido M, Sado  
613 Y, Takeshita M, Iwasaki W, Yamanaka H, Kondoh M, MiyaM. (2017)  
614 Environmental DNA enables detection of terrestrial mammals from forest pond  
615 water. *Mol. Ecol. Resour.* 17: e63-e75. <https://doi.org/10.1111/1755-0998.12690>
- 616 Ushio M, Murata K, Sado T, Nishiumi I, Takeshita M, Iwasaki W, Miya M (2018)  
617 Demonstration of the potential of environmental DNA as a tool for the detection of  
618 avian species. *Sci. Rep.* 8: 1-10. <https://doi.org/10.1038/s41598-018-22817-5>
- 619 Yamazaki H, Sekiya T, Nagayama S, Hirasawa K, Tokura K, Sasaki A, Ichiyanagi H,  
620 Tojo K (2020) Development of microsatellite markers for a soricid water shrew,  
621 *Chimarrogale platycephalus*, and their successful use for individual identification.  
622 *Genes Genet. Syst.* 95: 201-210. <https://doi.org/10.1266/ggs.20-00017>
- 623 Yano K, Takenaka M, TojoK (2019) Genealogical position of Japanese populations of  
624 the globally distributed mayfly *Cloeon dipterum* and related species (Ephemeroptera,  
625 Baetidae): A molecular phylogeographic analysis. *Zool. Sci.* 36: 479-489.  
626 <https://doi.org/10.2108/zs190049>
- 627 Yano K, Takenaka M, Mitamura T, Tojo K (2020) Identifying a “pseudogene” for the  
628 mitochondrial DNA COI region of the corixid aquatic insect, *Hesperocorixa distanti*  
629 (Heteroptera, Corixidae). *Limnology* 21: 319-325. <https://doi.org/10.1007/s10201-020-00618-y>
- 631 Valentini A, Pompanon F, Taberlet P (2009). DNA barcoding for ecologists. *Trends Ecol.*  
632 *Evol.* 24: 110-117. <https://doi.org/10.1016/j.tree.2008.09.011>

633 Vuataz L, Sartori M, Gattolliat JL, Monaghan MT (2013) Endemism and diversification  
634 in freshwater insects of Madagascar revealed by coalescent and phylogenetic  
635 analysis of museum and field collections. *Mol. Phylogenet. Evol.* 66: 979-991.  
636 <https://doi.org/10.1016/j.ympev.2012.12.003>  
637

638 **Figure Legends**

639 **Figure 1.** Concordance rate of primers site sequences. Gray bands show the sequences of  
640 each primer, while under gray bands show stability of the sequence within compared taxa.

641

642 **Figure 2.** The barcoding region and the primer region were arranged using some of the  
643 sequences used in the development of each primer. The DNA barcoding regions  
644 suggested in this study in both the mtDNA 16S rRNA and 12S rRNA regions have high  
645 polymorphism and versatility by placing a hypervariable region between regions with  
646 highly conserved regions. Legends, green: “A” of nucleic acid sequence, red: “T” of  
647 nucleic acid sequence, “G” of nucleic acid sequence, “C” of nucleic acid sequence.

648

649 **Figure 3.** A phylogenetic cladogram based on concatenated data of the mtDNA 16S  
650 rRNA and the 12S rRNA regions to examine species identification sensitivity. The same  
651 species are shown by solid lines, and the same genus is shown by dashed lines.

652

653 **Figure 4.** The estimated phylogenetic relationships (ML methods) based on the mtDNA  
654 16S rRNA and 12S rRNA regions.

655

656

657

Table 1. List of specimens examined in this study, sequence types, and the GenBank accession numbers

| Family          | Species                          | Locality name | GPS*                                     |           | The GenBank accession numbers |          |                |          |          |
|-----------------|----------------------------------|---------------|------------------------------------------|-----------|-------------------------------|----------|----------------|----------|----------|
|                 |                                  |               | Latitude                                 | Longitude | mtDNA 16S rRNA                |          | mtDNA 12S rRNA |          |          |
|                 |                                  |               | (N)                                      | (E)       | Barcoding                     | Database | Barcoding      | Database |          |
| Insecta         |                                  |               |                                          |           |                               |          |                |          |          |
| Zygentoma       |                                  |               |                                          |           |                               |          |                |          |          |
| Lepismatidae    | <i>Thermobia domestica</i>       | Zyg_1         | Niimi laboratory strain                  | -         | -                             | LC656038 | -              | -        | -        |
| Ephemeroptera   |                                  |               |                                          |           |                               |          |                |          |          |
| Baetidae        | <i>Cloeon dipterum</i>           | Eph_1         | Japan:Nara,Sango,Tatsunokita             | 34.59496  | 135.68168                     | LC656039 | LC656119       | LC656806 | LC656864 |
| Heptageniidae   | <i>Bleptus fasciatus</i>         | Eph_2         | Japan:Nagano,Azumino,Horigane            | 36.30581  | 137.78880                     | LC656040 | LC656120       | LC656807 | LC656865 |
|                 | <i>Bleptus michinokuensis</i>    | Eph_3         | Japan: Fukushima,Fukushima,Tsuchiyuonsen | 37.67972  | 140.24361                     | LC656041 | LC656121       | LC656808 | LC656866 |
| Isonychiidae    | <i>Isonychia japonica</i>        | Eph_4         | Japan:Nagano,Ina,Nishiharuchika          | 35.82555  | 137.95057                     | LC656042 | -              | LC656809 | LC656867 |
|                 |                                  | Eph_5         | Japan:Okayama,Maniwa,Kojiro              | 35.10613  | 133.64750                     | LC656043 | LC656122       | LC656810 | LC656868 |
| Isonychiidae    | <i>Isonychia shima</i>           | Eph_6         | Japan:Miyagi,Osaki,Naruko-onsen          | 38.74012  | 140.74065                     | LC656044 | LC656123       | LC656811 | LC656869 |
| Ephemerellidae  | <i>Drunella basalis</i>          | Eph_7         | Japan:Nagano,Matsumoto,Azumi             | 36.24880  | 137.63759                     | LC656045 | LC656124       | LC656812 | LC656870 |
| Leptophlebiidae | <i>Paraleptophlebia japonica</i> | Eph_8         | Japan:Kochi,Nakatosa,Kure                | 33.30871  | 133.19434                     | LC656046 | LC656125       | LC656813 | LC656871 |
|                 |                                  | Eph_9         | Japan:Kochi,Muroto,Sakihama              | 33.46041  | 134.19602                     | LC656047 | -              | -        | -        |
| Polymitarcyidae | <i>Ephoron shigae</i>            | Eph_10        | Japan: Niigata, Ojija,Iwasawa            | 37.24570  | 138.80470                     | LC656048 | LC656126       | LC656814 | LC656872 |
| Potamanthidae   | <i>Potamanthus formosus</i>      | Eph_11        | Japan:Oita,Oita,Shimohanda               | 33.16303  | 131.64708                     | LC656049 | LC656127       | LC656815 | LC656873 |
| Ephemeridae     | <i>Ephemera japonica</i>         | Eph_12        | Japan:Kochi,Muroto,Sakihama              | 33.44480  | 134.21730                     | LC656050 | LC656128       | LC656816 | LC656874 |
|                 | <i>Ephemera strigata</i>         | Eph_13        | Japan:Aichi,Okazaki,Yomogyu              | 34.94153  | 137.26815                     | -        | -              | LC656817 | LC656875 |

|                     |                                                 |                                 |                                |                        |           |          |          |          |          |          |
|---------------------|-------------------------------------------------|---------------------------------|--------------------------------|------------------------|-----------|----------|----------|----------|----------|----------|
| Siphonuridae        | <i>Siphonurus</i> sp.                           | Eph_14                          | Japan:Nagano,Chikuma,Wakamiya  | 36.49517               | 138.13783 | LC656051 | LC656129 | LC656818 | LC656876 |          |
| Ameletidae          | <i>Ameletus</i> sp.                             | Eph_15                          | Japan:Nagano,Matsumoto,Azumi   | 36.24880               | 137.63759 | LC656052 | LC656130 | LC656819 | LC656877 |          |
| Dipteromimidae      | <i>Dipteromimus tipuliformis</i>                | Eph_16                          | Japan:Tokyo,Hinode,Oguno       | 35.77498               | 139.19145 | LC656053 | -        | -        | -        |          |
|                     |                                                 | Eph_17                          | Japan:Kochi,Kitagawa,Kashiwagi | 33.47795               | 134.07485 | LC656054 | LC656131 | LC656820 | -        |          |
| Odonata             |                                                 |                                 |                                |                        |           |          |          |          |          |          |
| Aeshnidae           | <i>Aeshna crenata</i>                           | Odo_1                           | Japan:Nagano,Matsumoto         | -                      | -         | LC656055 | -        | -        | -        |          |
|                     |                                                 | Odo_2                           | Japan:Nagano,Azumino           | -                      | -         | LC656056 | -        | -        | -        |          |
|                     |                                                 | Odo_3                           | Japan:Nagano,Shiojiri          | -                      | -         | LC656057 | -        | -        | -        |          |
|                     |                                                 | <i>Aeshna juncea</i>            | Odo_4                          | Japan:Nagano,Matsumoto | -         | -        | LC656058 | LC656132 | LC656821 | LC656878 |
| Libellulidae        | <i>Deiella phaon</i>                            | Odo_5                           | Japan:Okayama,Okayama          | -                      | -         | LC656059 | -        | -        | -        |          |
|                     |                                                 | Odo_6                           | Japan:Ibaraki,Kasama           | -                      | -         | LC656060 | LC656133 | LC656822 | -        |          |
| Libellulidae        | <i>Sympetrum depressiusculum</i>                | Odo_7                           | Japan:Nagano                   | -                      | -         | LC656061 | LC656134 | LC656823 | LC656879 |          |
|                     |                                                 | Odo_8                           | Japan:Nagano,Matsumoto         | -                      | -         | LC656062 | -        | -        | -        |          |
|                     |                                                 | <i>Libellula quadrimaculata</i> | Odo_9                          | Japan:Nagan,Matsumoto  | -         | -        | LC656063 | LC656135 | LC656824 | LC656880 |
|                     |                                                 | <i>Sympetrum croceolum</i>      | Odo_10                         | Japan:Nagan,Matsumoto  | -         | -        | LC656064 | LC656136 | LC656825 | LC656881 |
|                     |                                                 | <i>Sympetrum parvulum</i>       | Odo_11                         | Japan:Nagan,Matsumoto  | -         | -        | LC656065 | LC656137 | LC656826 | LC656882 |
|                     |                                                 | <i>Pseudothemis zonata</i>      | Odo_12                         | Japan:Nagano,Matsumoto | -         | -        | LC656066 | -        | -        | -        |
|                     | Corduliidae                                     | <i>Somatochlora</i> sp.         | Odo_13                         | Japan:Nagan,Matsumoto  | -         | -        | LC656067 | LC656138 | LC656827 | LC656883 |
| <i>Cordulia</i> sp. |                                                 | Odo_14                          | Japan:Nagan,Matsumoto          | -                      | -         | LC656068 | LC656139 | LC656828 | LC656884 |          |
| Megapodagrionidae   | <i>Rhipidolestes amamiensis amamiensis</i>      | Odo_15                          | Japan:Kagoshima,Amami          | -                      | -         | LC656069 | LC656140 | LC656829 | LC656885 |          |
|                     | <i>Rhipidolestes amamiensis tokunoshimensis</i> | Odo_16                          | Japan:Kagoshima,Tokunoshima    | -                      | -         | LC656070 | -        | -        | -        |          |
|                     | <i>Rhipidolestes shozoi</i>                     | Odo_17                          | Japan:Okinawa,Nago             | -                      | -         | LC656071 | -        | -        | -        |          |

|                |                                 |        |                                   |          |            |          |          |          |          |
|----------------|---------------------------------|--------|-----------------------------------|----------|------------|----------|----------|----------|----------|
| Euphaeidae     | <i>Euphaea yayeyamana</i>       | Odo_18 | Japan:Okinawa,Ishigaki            | -        | -          | LC656072 | -        | -        | -        |
|                | <i>Euphaea formosa</i>          | Odo_19 | Taiwan                            | -        | -          | LC656073 | LC656141 | LC656830 | LC656886 |
| Coenagrionidae | <i>Ischnura asiatica</i>        | Odo_20 | Japan:Nagano,Azumino              | -        | -          | LC656074 | LC656142 | LC656831 | LC656887 |
| Plecoptera     |                                 |        |                                   |          |            |          |          |          |          |
| Scopuridae     | <i>Scopura montana</i>          | Ple_1  | Japan:Fukushima,Tadami,Tadami     | 37.38463 | 139.27148  | LC656075 | LC656143 | LC656832 | LC656888 |
|                | <i>Scopura longa</i>            | Ple_2  | Japan:Niigata,Sado,Koda           | 38.20202 | 138.43325  | LC656076 | LC656144 | LC656833 | LC656889 |
|                | <i>Scopura quattuorhamulata</i> | Ple_3  | Japan:Hokkaido,Hidaka,Mitsuiwa    | 42.79407 | 142.45286  | LC656077 | LC656145 | -        | -        |
| Peltoperlidae  | <i>Cryptoperla japonica</i>     | Ple_4  | Japan:Kochi,Muroto,Murotsu        | 33.34711 | 134.18271  | LC656078 | LC656146 | LC656834 | LC656890 |
|                |                                 | Ple_5  | Japan:Niigata,Sado,Hayoshi        | 38.11197 | 138.39410  | LC656079 | LC656147 | LC656835 | LC656891 |
|                | <i>Yoraperla uenoi</i>          | Ple_6  | Japan:Niigata,Uonuma,Oshirakawa   | -        | -          | LC656080 | -        | -        | -        |
| Pteronarcyidae | <i>Pteronarcys californica</i>  | Ple_7  | USA:Idaho,Twin Falls              | 42.33860 | -114.28771 | LC656081 | LC656148 | LC656836 | LC656892 |
| Chloroperlidae | <i>Sweltsa</i> sp.              | Ple_8  | Japan:Nagano,Matsumoto,Azumi      | 36.24880 | 137.63759  | -        | LC656149 | LC656837 | LC656893 |
|                | Chloroperlidae Gen. sp.         | Ple_9  | Japan:Nagano                      | -        | -          | LC656082 | -        | -        | -        |
| Orthoptera     |                                 |        |                                   |          |            |          |          |          |          |
| Acrididae      | <i>Chorthippus fallax</i>       | Ort_1  | Japan:Shizuoka,Fujinomiya,Awakura | -        | -          | LC656083 | -        | LC656838 | LC656894 |
| Dermaptera     |                                 |        |                                   |          |            |          |          |          |          |
| Labiduridae    | <i>Labidura riparia</i>         | Der_1  | Niimi laboratory strain           | -        | -          | LC656084 | LC656150 | LC656839 | LC656895 |
| Phasmatodea    |                                 |        |                                   |          |            |          |          |          |          |
| Phasmatidae    | <i>Ramulus mikado</i>           | Pha_1  | Japan:Nagano,Azumino,Akashina     | 36.36432 | 137.94301  | LC656085 | LC656151 | LC656840 | LC656896 |
| Mantodea       |                                 |        |                                   |          |            |          |          |          |          |
| Mantidae       | <i>Tenodera sinensis</i>        | Man_1  | Japan:Nagano,Ueda,Sanada          | 36.45611 | 138.35000  | LC656086 | LC656152 | LC656841 | LC656897 |
| Hemiptera      |                                 |        |                                   |          |            |          |          |          |          |
| Belostomatidae | <i>Appasus japonicus</i>        | Hem_1  | Japan:Nagano,Chino                | -        | -          | LC656087 | LC656153 | LC656842 | LC656898 |

|                |                                         |        |                                         |          |           |          |          |          |          |
|----------------|-----------------------------------------|--------|-----------------------------------------|----------|-----------|----------|----------|----------|----------|
|                | <i>Appasus major</i>                    | Hem_2  | Japan:Aomori,Aomori                     | -        | -         | LC656088 | LC656154 | LC656843 | LC656899 |
| Nepidae        | <i>Laccotrephes japonensis</i>          | Hem_3  | South Korea:Gyeongsangbuk               | -        | -         | LC656089 | LC656155 | LC656844 | LC656900 |
|                | <i>Nepa hoffmanni</i>                   | Hem_4  | Japan:Wakayama,Hashimoto                | -        | -         | LC656090 | LC656156 | LC656845 | LC656901 |
|                |                                         | Hem_5  | Japan:Aichi,Toyota                      | -        | -         | LC656091 | -        | -        | -        |
|                |                                         | Hem_6  | Japan:Wakayama,Hashimoto                | -        | -         | LC656092 | -        | -        | -        |
|                | <i>Ranatra chinensis</i>                | Hem_7  | Japan:Okinawa,Kume                      | -        | -         | LC656093 | LC656157 | LC656846 | LC656902 |
| Corixidae      | <i>Hesperocorixa distanti hokkensis</i> | Hem_8  | Japan:Fukushima,Shirakawa               | -        | -         | LC656094 | LC656158 | LC656847 | LC656903 |
|                | <i>Hesperocorixa distanti distanti</i>  | Hem_9  | Japan:Hokkaido,Ishikari                 | -        | -         | LC656095 | LC656159 | -        | -        |
|                | <i>Hesperocorixa kolthoffi</i>          | Hem_10 | Japan:Fukuoka,Kitakyushu                | -        | -         | LC656096 | LC656160 | -        | -        |
| Neuroptera     |                                         |        |                                         |          |           |          |          |          |          |
| Myrmeleontidae | <i>Hagenomyia micans</i>                | Neu_1  | Japan:Nagano,Matsumoto,Shinagura        | 36.29241 | 137.99015 | LC656097 | LC656161 | LC656848 | LC656904 |
| Mantispidae    | <i>Mantispa japonica</i>                | Neu_2  | Japan:Nagano,Matsumoto,Satoyamabe       | 36.24843 | 138.01241 | LC656098 | -        | LC656849 | LC656905 |
|                |                                         | Neu_3  | Japan:Ishikawa,Nanao,Notojimagari       | 37.14830 | 136.98442 | LC656099 | -        | -        | -        |
| Diptera        |                                         |        |                                         |          |           |          |          |          |          |
| Chironomidae   | Chironomidae Gen. sp.                   | Dip_1  | Japan:Gifu,Takayama,Okuhidaonsengonakao | 36.23879 | 137.59551 | LC656100 | LC656162 | LC656850 | LC656906 |
|                | Chironomidae Gen. sp.                   | Dip_2  | Japan:Gifu,Takayama,Okuhidaonsengonakao | 36.23879 | 137.59551 | LC656101 | -        | -        | -        |
| Coleoptera     |                                         |        |                                         |          |           |          |          |          |          |
| Dytiscidae     | <i>Agabus japonicus</i>                 | Col_1  | Japan:Niigata,Gosen                     | -        | -         | LC656102 | LC656163 | LC656851 | LC656907 |
|                | <i>Cybister chinensis</i>               | Col_2  | Japan:Nagano,Matsumoto                  | -        | -         | LC656103 | LC656164 | LC656852 | LC656908 |
| Lucanidae      | <i>Dorcus montivagus</i>                | Col_3  | Japan:Niigata,Yuzawa,Mitsumata          | -        | -         | LC656104 | LC656165 | LC656853 | LC656909 |



|                    |                                 |        |                                  |          |           |          |          |          |          |
|--------------------|---------------------------------|--------|----------------------------------|----------|-----------|----------|----------|----------|----------|
| Meloidae           | <i>Meloe coarctatus</i>         | Col_4  | Japan:Nagano,Matsumoto,Iriyamabe | -        | -         | LC656105 | LC656166 | LC656854 | LC656910 |
|                    | <i>Meloe</i> sp.                | Col_5  | Japan:Tochigi,Nikko,Chugushi     | -        | -         | LC656106 | -        | -        | -        |
|                    |                                 | Col_6  | Japan:Tochigi,Nikko,Chugushi     | -        | -         | LC656107 | -        | -        | -        |
| Lepidoptera        |                                 |        |                                  |          |           |          |          |          |          |
| Pieridae           | <i>Eurema hecabe</i>            | Lep_1  | Niimi laboratory strain          | -        | -         | LC656108 | LC656167 | LC656855 | LC656911 |
| Trichoptera        |                                 |        |                                  |          |           |          |          |          |          |
| Stenopsychidae     | <i>Stenopsyche marmorata</i>    | Tri_1  | Japan:Nagano,Matsumoto,Mizukuma  | 36.26313 | 137.98338 | LC656109 | LC656168 | LC656856 | LC656912 |
|                    | <i>Stenopsyche schmidi</i>      | Tri_2  | Japan:Kagoshima,Amami            | -        | -         | LC656110 | LC656169 | LC656857 | LC656913 |
| Rhyacophilidae     | <i>Rhyacophila</i> sp.          | Tri_3  | Japan:Nara,Kamikitayama          | -        | -         | LC656111 | LC656170 | LC656858 | LC656914 |
|                    | <i>Rhyacophila verecunda</i>    | Tri_4  | Japan:Hyogo,Yabu,Oyachoyokoiki   | -        | -         | LC656112 | -        | LC656859 | LC656915 |
| Limnephilidae      | <i>Pseudostenophylax</i> sp.    | Tri_5  | Japan:Nagano,Takayama,Maki       | 36.64366 | 138.44631 | LC656113 | LC656171 | LC656860 | LC656916 |
| Limnacentropodidae | <i>Limnacentropus insolitus</i> | Tri_6  | Japan:Nagano,Matsumoto,Misayama  | 36.27342 | 138.02556 | LC656114 | LC656172 | LC656861 | LC656917 |
| Helicopsychidae    | <i>Helicopsyche</i> sp.         | Tri_7  | Japan:Aichi,Okazaki,Ishihara     | 34.95250 | 137.39753 | LC656115 | LC656173 | LC656862 | LC656918 |
| Hydroptilidae      | <i>Palaeagapetus ovatus</i>     | Tri_8  | Japan:Nagano,Matsumoto,Azumi     | 36.25544 | 137.63853 | LC656116 | LC656174 | -        | -        |
|                    |                                 | Tri_9  | Japan:Nagano,Matsumoto,Azumi     | 36.25545 | 137.63853 | LC656117 | -        | -        | -        |
| Calamoceratidae    | <i>Anisocentropus kawamurai</i> | Tri_10 | Japan:Tokushima,Tokushima,Hata   | 33.97891 | 134.50219 | LC656118 | -        | LC656863 | LC656919 |

\*For rare species, there were samples for which detailed points could not be shown.

**Table 2. Information on the newly designed primer sets in this study**

| Gene           | Primer name            | Primer direction | Primer sequence (5'-3') | Target groups               | purpose                                |
|----------------|------------------------|------------------|-------------------------|-----------------------------|----------------------------------------|
| mtDNA 16S rRNA | MtInsects-16S_F        | Forward          | GGACGAGAAGACCCTWTAGA    | All                         | DNA barcoding                          |
|                | MtInsects-16S_R        | Reverse          | ATCCAACATCGAGGTCGCAA    | All                         | DNA barcoding                          |
|                | AQdb-16S_F             | Forward          | TRACYGTRCAAAGGTAGC      | All                         | Phylogeny and database                 |
|                | AQdb-16S_R             | Reverse          | CCGGTYTAACTCARATCATGT   | All                         | Phylogeny and database                 |
| mtDNA 12S rRNA | MtInsects-12S_HemHol_F | Forward          | GTGCCAGCHDYCGGTTA       | Hemimetabola & Holometabola | DNA barcoding & Phylogeny and database |
|                | MtInsects-12S_Hem_R    | Reverse          | HATARDRGGGTMTCTAATCC    | Hemimetabola                | DNA barcoding                          |
|                | MtInsects-12S_Hol_R    | Reverse          | TARTAGGTATCTAATCCTAG    | Holometabola                | DNA barcoding                          |
|                | MtInsects-12S_cad_F    | Forward          | TTGKGCCAGCARTYCGGTWA    | Trichoptera                 | DNA barcoding                          |
|                | MtInsects-12S_cad_R    | Reverse          | WATARTRGRGTATCTAATYC    | Trichoptera                 | DNA barcoding                          |
|                | AQdb-12S_Hem_R         | Reverse          | CTACTWTGTTACGACTTRT     | Hemimetabola                | Phylogeny and database                 |
|                | AQdb-12S_Hol_R         | Reverse          | TAMWYCTACTWTGTTACGACTT  | Holometabola                | Phylogeny and database                 |
|                | AQdb-12S_cad_R         | Reverse          | ARYGACGGGCAATATGTRC     | Trichoptera                 | Phylogeny and database                 |

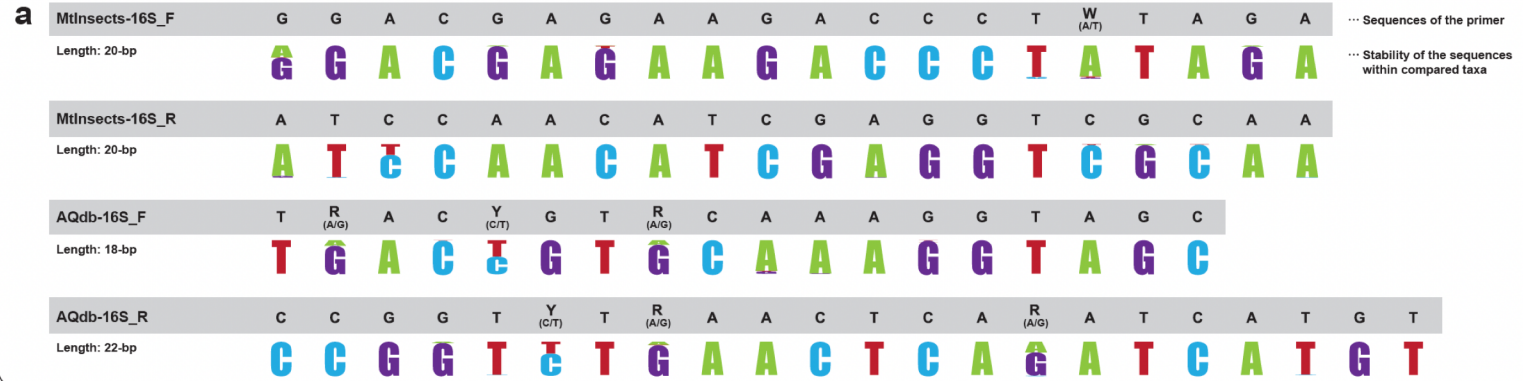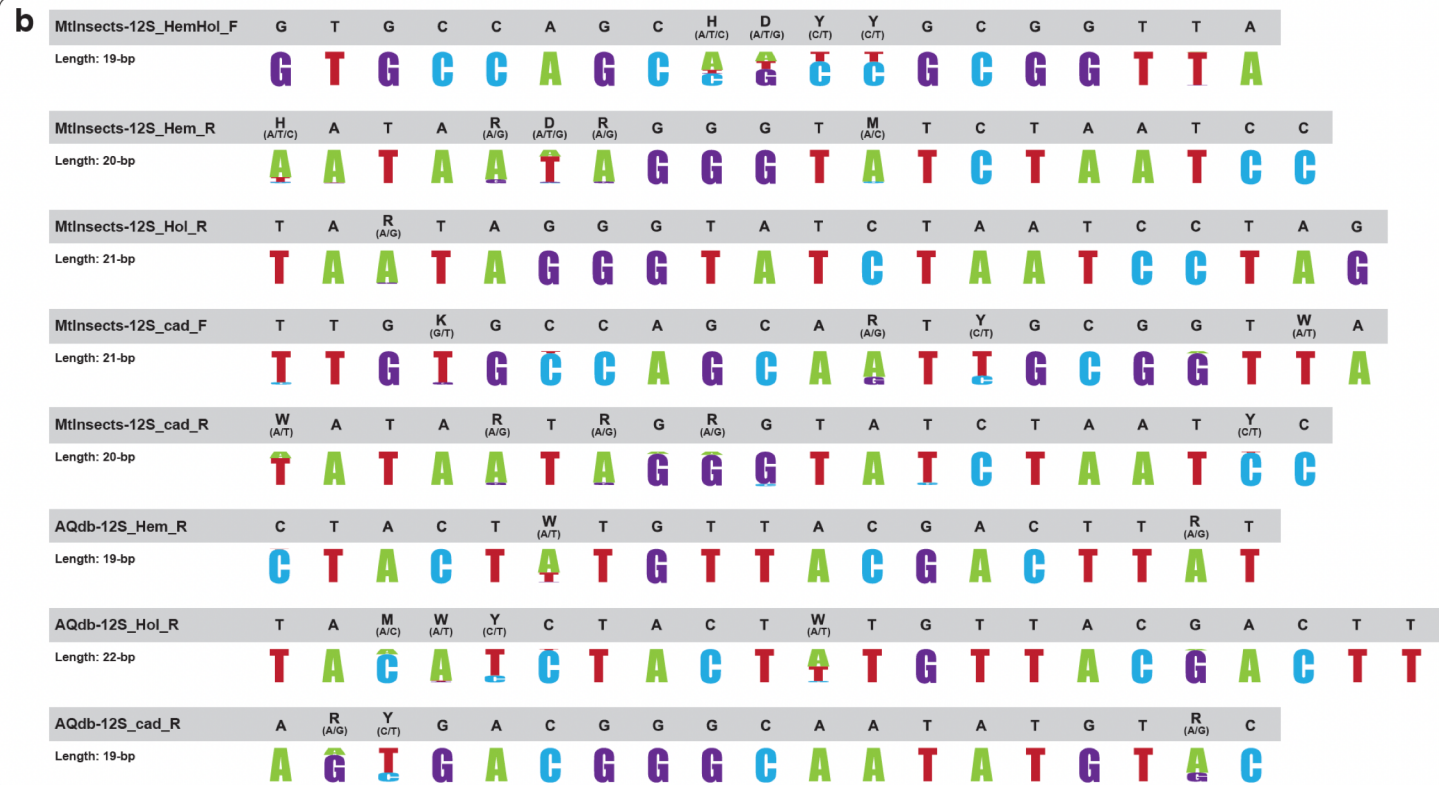

Figure 1



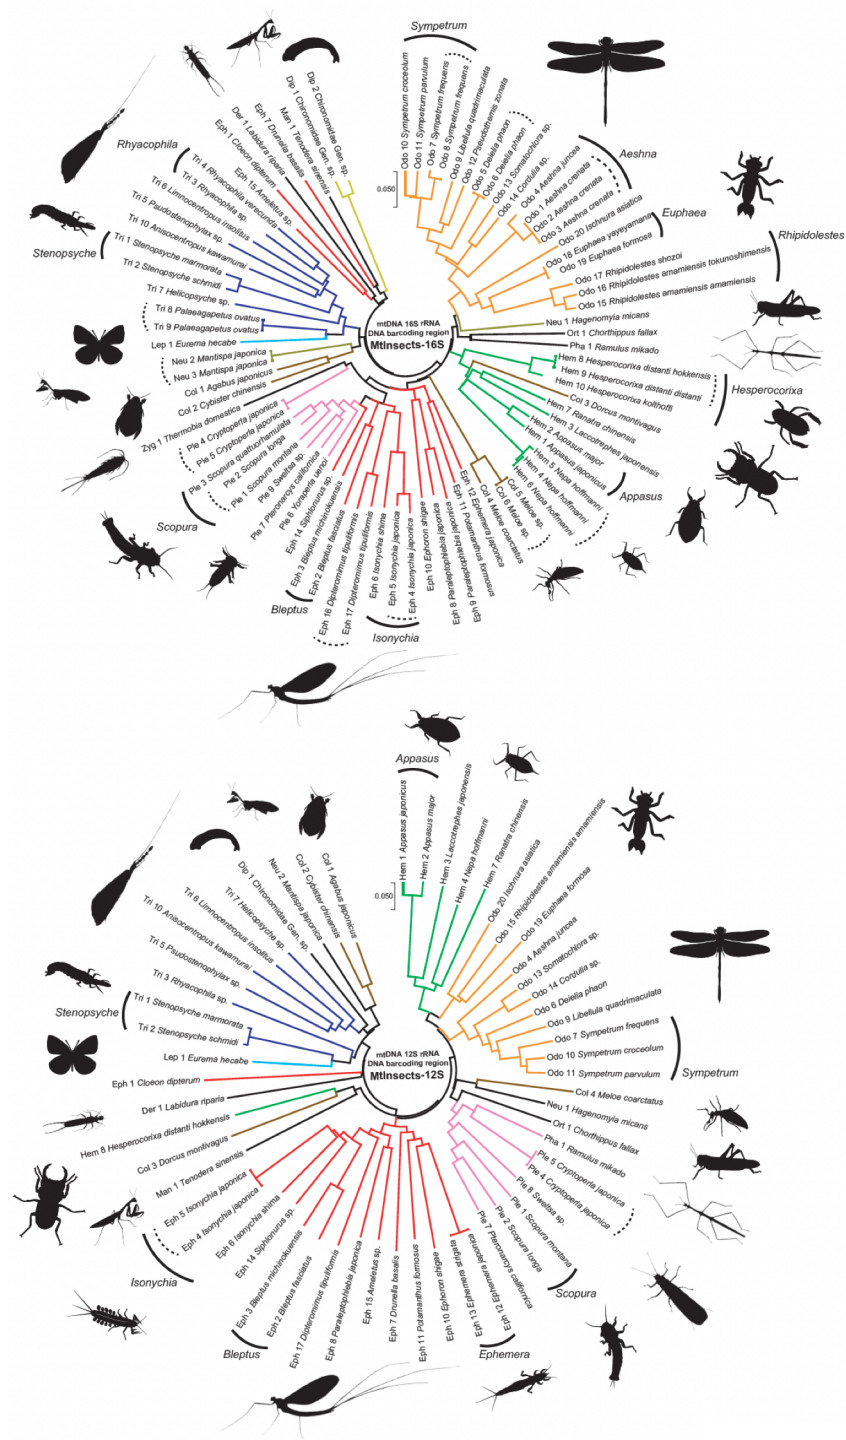

Figure 3

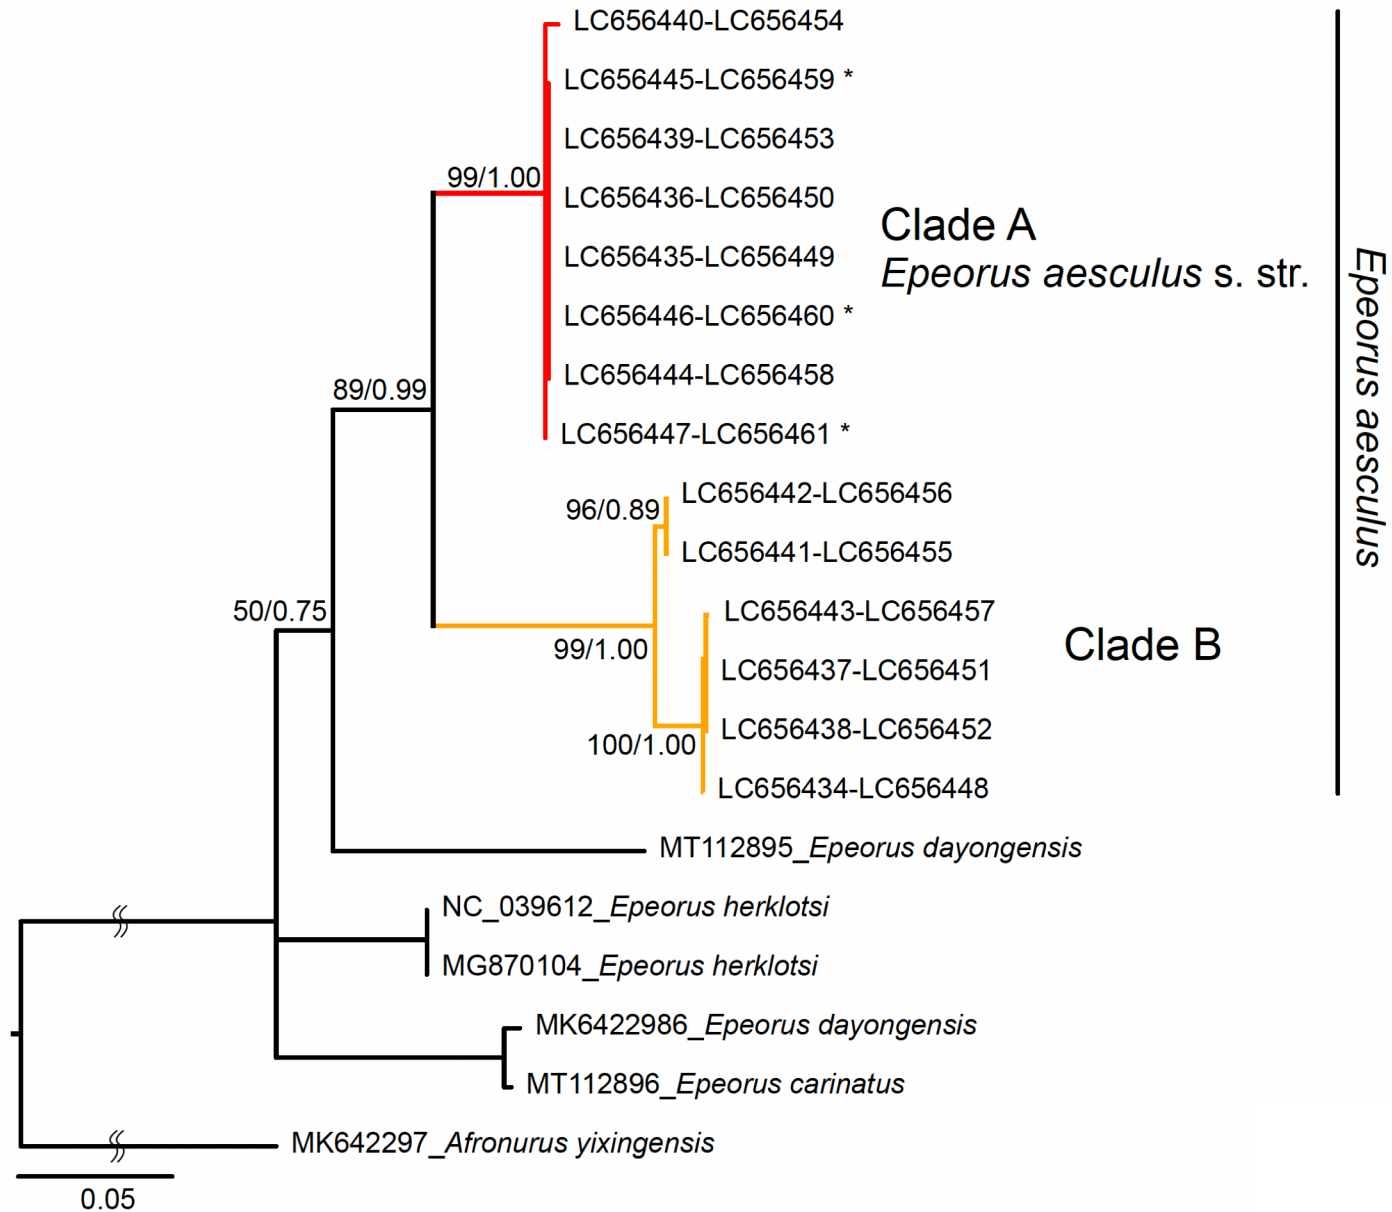

Figure 4
